# Supplementary material for: The TvLEGU-1, a Legumain-Like Cysteine Proteinase, Plays a Key Role inTrichomonas vaginalisCytoadherence
Source: Hindawi journal article supplement (doi:10.1155/2013/561979), 2013-01-01
Supplement: f1 [file 561979.f1.pdf]

Figure 1S

|     |            |            |             |            |            |            |            |            |            |
|-----|------------|------------|-------------|------------|------------|------------|------------|------------|------------|
| 1   | MFCLLQ     | LARC       | DRFAVLIAGS  | I          | NDFYNYRHQA | II         | DIFNMYQQLV | III        | KRGFDDQHIT |
| 51  | MMAYDDIALS | IV         | SENPFGRGKVF | V          | HTLKHVNIYP | GSSKINYAHN | VI         | SVTADQFYTV | VII        |
| 101 | LTTLKSTTSD | VIII       | NVYIYYDNHG  | IX         | GPGILGVDPG | VPGGYIEAEP | X          | LAKAFDTMEA |            |
| 151 | KGLYGKLF   | FFG        | IEACYSGSVA  | AVFRAKNMCT | ITAANDESS  | YAAVYDSTVG |            |            |            |
| 201 | VYLSNEFSNY | F          | MAYLDSNPQ   | NTIGNLYTKV | KAQTTGSHVC | YYGDVNMKNL |            |            |            |
| 251 | KLSDFLGTPN | EVVAPKADAK | IDIIPHYLAT  | KSTLYQLAQS | TDAKIAGRAK |            |            |            |            |
| 301 | VALHEVIAAA | EKLDLTLT   | TSI         | AEILEPETKN | VLRACGKIT  | PEYFEVLHYF |            |            |            |
| 351 | TEKYGVVKGD | DMIKLRVLVN | LALKHKVADI  | KAIDAIC    |            |            |            |            |            |

### Supplementary figure legend

Figure 1S. Matched peptides identified in the three protein spots recognized by the anti-TvLEGU-1r antibody in the deduced amino acid sequence of the TvLEGU-1 protein. Boxes in gray show the matched peptides obtained from tryptic digestion and mass spectrometry (Table 1). Consecutive Roman numbers (I-X) were assigned to the identified peptides.
